# Supplementary material for: Reprogramming of Amino Acid Metabolism Differs between Community-Acquired Pneumonia and Infection-Associated Exacerbation of Chronic Obstructive Pulmonary Disease
Source: MDPI journal article supplement (doi:10.3390/cells11152283), 2022-07-24
Supplement: s1 [file s1]

## Supplement

### *Reprogramming of amino acid metabolism differs between community-acquired pneumonia and infection-associated exacerbation of chronic obstructive pulmonary disease*

Haroon Arshad, Anastasios Siokis, Raimo Franke, Aamna Habib, Juan Carlos Lopez Alfonso, Yuliya Poliakova, Eva Lücke, Katina Michaelis, Mark Brönstrup, Michael Meyer-Hermann, Ursula Bilitewski, Jordi Vila, Laurent Abel, Thomas Illig, Jens Schreiber, Frank Pessler

#### Table of Contents

**Figure S1.** Mean plasma concentrations of amino acids and amino acid metabolites.

**Figure S2.** Identification of analytes to be used for subsequent analyses.

**Figure S3.** Impact of self-reported cardiovascular disease and diabetes on concentrations of Met, ADMA, and SDMA in CAP and COPD.

**Table S1.** Inclusion and exclusion criteria.

**Table S2.** List of metabolism indicators.

**Table S3.** Identification of diagnostic biomarkers by ROC curve analysis.

**Table S4.** Results of oversampling procedure, modeling the effect of increasing sample size of COPD to sample size of CAP ( $n = 29$ ).

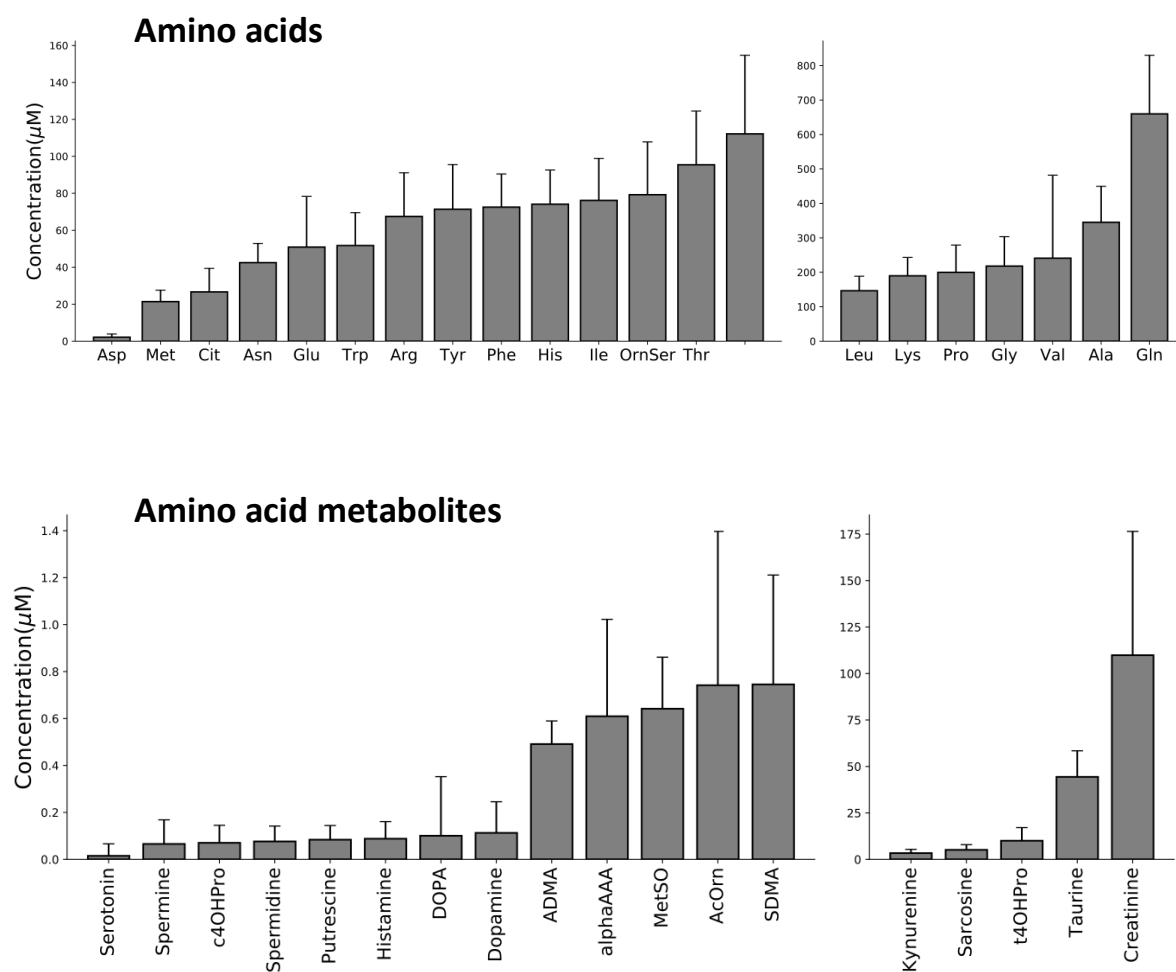

**Figure S1. Mean plasma concentrations of amino acids and amino acid metabolites.** Values are based on all 21 amino acids and 21 amino acid metabolites detectable with the targeted metabolomic approach used (AbsoluteIDQ™ p180 kit, Biocrates Life Sciences, Innsbruck, Austria). Bars = standard deviation.

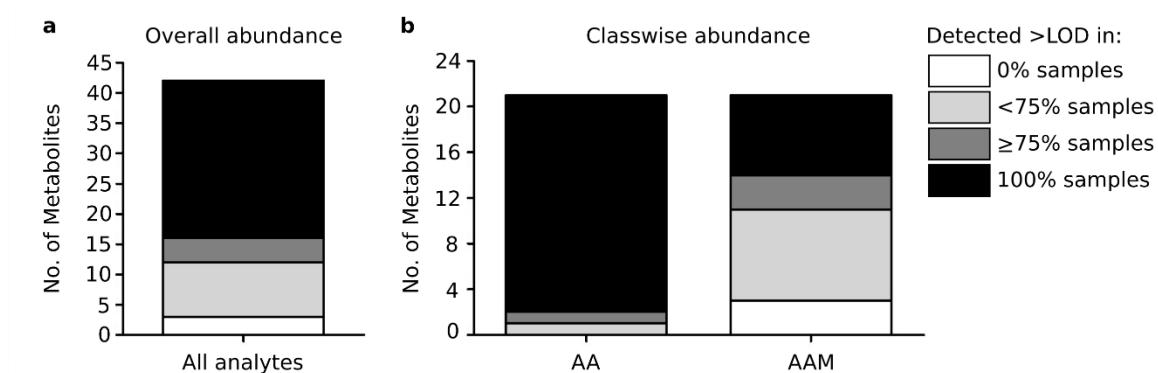

**Figure S2. Identification of analytes to be used for subsequent analyses.** The percentage of samples in which the analytes were detected >LOD is indicated by the fill darkness. Only analytes detected >LOD in ≥75% of the samples (black and dark grey fill) were included in subsequent analyses. **(A)** Of the 21 potentially detectable amino acids, 20 (95%) were detected >LOD in ≥75% of the samples. **(B)** Of the 21 potentially detectable amino acid metabolites 10 (48%) were detected >LOD in ≥75% of the samples. AA = amino acids; AAM = amino acid metabolites.

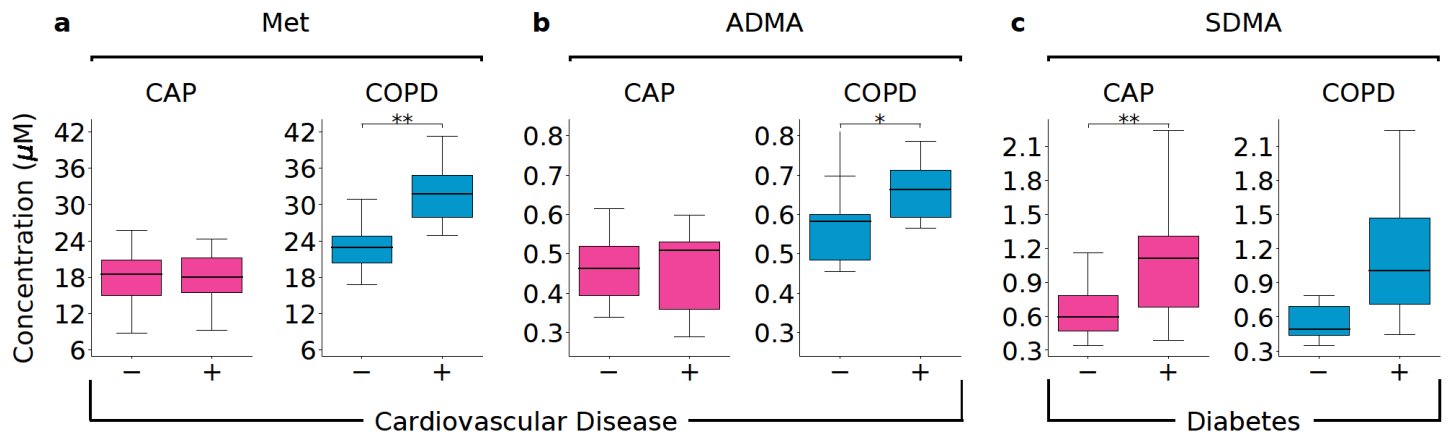

**Figure S3. Impact of self-reported cardiovascular disease and diabetes on concentrations of Met, ADMA, and SDMA in CAP and COPD.** Data were extracted from the data set used for Figures 1 and 2, but stratified according to self-reported diabetes (CAP) and cardiovascular disease (COPD). (a) Met (methionine), (b) ADMA (asymmetric dimethylarginine), (c) SDMA (symmetric dimethylarginine).

## Supplemental Tables

| Table S1. Inclusion and exclusion criteria |                                                                                                                                                                                                               |
|--------------------------------------------|---------------------------------------------------------------------------------------------------------------------------------------------------------------------------------------------------------------|
| Inclusion criteria                         |                                                                                                                                                                                                               |
|                                            | <b>CAP</b>                                                                                                                                                                                                    |
|                                            | Pulmonary infiltrate on chest x-ray                                                                                                                                                                           |
|                                            | At least two of the following four symptoms: cough, purulent sputum production, dyspnea, pleuritic chest pain                                                                                                 |
|                                            | At least two out of fever/hypothermia, hypotension, tachycardia, tachypnea                                                                                                                                    |
|                                            | At least one out of hypoxemia, evidence of pulmonary consolidation, leukocytosis or leukopenia                                                                                                                |
|                                            | Need for inpatient treatment as judged by the examining physician                                                                                                                                             |
|                                            | <b>Infection-triggered COPD exacerbation</b>                                                                                                                                                                  |
|                                            | Documented history of COPD                                                                                                                                                                                    |
|                                            | Sudden deterioration in respiratory status/lung function                                                                                                                                                      |
|                                            | Symptoms (increase in sputum production, cough) and/or laboratory abnormalities (increased CRP and/or detection of a respiratory pathogen) suggestive of an infectious trigger or coexisting airway infection |
|                                            | No radiographic evidence of pneumonia                                                                                                                                                                         |
|                                            | <b>Control group</b>                                                                                                                                                                                          |
|                                            | No evidence of chronic or acute lung disease                                                                                                                                                                  |
|                                            | No evidence of acute or chronic inflammation                                                                                                                                                                  |
| Exclusion criteria                         |                                                                                                                                                                                                               |
|                                            | Chemotherapy                                                                                                                                                                                                  |
|                                            | Immunosuppression other than corticosteroids                                                                                                                                                                  |

| Table S2. List of metabolism indicators*                           |                              |                                                                   |                                                                     |
|--------------------------------------------------------------------|------------------------------|-------------------------------------------------------------------|---------------------------------------------------------------------|
| Sums (mean concentrations)                                         |                              | Description                                                       | Metabolic significance**                                            |
| 1                                                                  | BCAA                         | Sum of branched chain amino acids                                 | Indicator of short-term metabolic control                           |
| 2                                                                  | Essential AA                 | Sum of essential amino acids                                      | Indicator of nutritional status                                     |
| 3                                                                  | Glucogenic AA                | Sum of selected glucogenic amino acids (alanine, glycine, serine) | Indicator of glycolytic vs. gluconeogenic activity                  |
| 4                                                                  | Glycolysis                   | Ala+Gly+Ser                                                       | Glycolysis intermediates produced from amino acid metabolism        |
| 5                                                                  | Essential AA                 | Sum of essential amino acids                                      | Indicator of nutritional status                                     |
| 6                                                                  | Non-essential AA             | Sum of non-essential amino acids                                  | n/s                                                                 |
| 7                                                                  | Total AA                     | Sum of all amino acids                                            | Indicator of nutritional status                                     |
|                                                                    |                              |                                                                   |                                                                     |
|                                                                    | <b>Ratios involving sums</b> |                                                                   |                                                                     |
| 1                                                                  | Total DMA / Arg              | Ratio of dimethylarginine to arginine                             | Activity of protein arginine methyl transferases (PRMT)             |
|                                                                    |                              |                                                                   |                                                                     |
| <b>Ratios of individual amino acids and amino acid metabolites</b> |                              |                                                                   |                                                                     |
| 1                                                                  | Tyr / Phe                    | Ratio of tyrosine to phenylalanine                                | Activity of phenylalanine hydroxylase                               |
| 2                                                                  | Thr / Ser                    | Ratio of threonine to serine                                      | KORA Study associates with rs541503 SNP in the PHGDH locus          |
| 3                                                                  | Asn / Gln                    | Ratio of asparagine to glutamine                                  | Activity of asparagine synthetase                                   |
| 4                                                                  | Cit / Arg                    | Ratio of citrulline to arginine                                   | Activity of NO synthase                                             |
| 5                                                                  | Cit / Orn                    | Ratio of citrulline to ornithine                                  | Activity of ornithine carbamoylphosphate transferase                |
| 6                                                                  | DOPA/Tyr                     | Ratio of DOPA to Tyrosine                                         | Activity of tyrosine hydroxylase enzyme                             |
| 7                                                                  | Gln / Asn                    | Ratio of glutamine to asparagine                                  | Activity of asparagine synthetase                                   |
| 8                                                                  | Glu/Gln                      | Ratio of glutamic acid to glutamine                               | Activity of glutaminase                                             |
| 9                                                                  | Gly / Arg                    | Ratio of glycine to arginine                                      | KORA Study associates with rs2216405 polymorphism in the CPS1 locus |
| 10                                                                 | Gly / Gln                    | Ratio of glycine to glutamine                                     | KORA Study associates with rs2216405 polymorphism in the CPS1 locus |

|                                                  |                         |                                            |                                                                                                                                                   |
|--------------------------------------------------|-------------------------|--------------------------------------------|---------------------------------------------------------------------------------------------------------------------------------------------------|
| 11                                               | Gly / His               | Ratio of glycine to histamine              | KORA Study associates with rs2216405 polymorphism in the CPS1 locus                                                                               |
| 12                                               | Kynurenine / Trp        | Ratio of kynurenine to tryptophan          | Activity of tryptophan 2, 3-dioxygenase which is the first step in the pathway to niacin. Kynurenine metabolites mediate immunological responses. |
| 13                                               | Met-SO / Met            | Ratio of methionine sulphate to methionine | Sulphonation is associated with immune modulation                                                                                                 |
| 14                                               | Orn / Arg               | Ratio of ornithine to arginine             | Activity of arginase                                                                                                                              |
| 15                                               | Orn / Ser               | Ratio of ornithine to serine               | KORA Study associates with rs541503 SNP in the PHGDH locus                                                                                        |
| 16                                               | Putrescine / Orn        | Ratio of putrescine to ornithine           | Activity of ornithine decarboxylase                                                                                                               |
| 17                                               | Serotonin / Trp         | Ratio of serotonin to tryptophan           | Rate of tryptophan degradation to serotonin                                                                                                       |
| 18                                               | Spermidine / Putrescine | Ratio of spermidine to putrescine          | Activity of spermidine synthase                                                                                                                   |
| 19                                               | Spermine / Spermidine   | Ratio of spermine to spermidine            | Activity of spermine synthase                                                                                                                     |
| * Adapted from (1).                              |                         |                                            |                                                                                                                                                   |
| **If indicative of a specific metabolic process. |                         |                                            |                                                                                                                                                   |

**Table S3 (pertains to Fig. 4): Identification of diagnostic biomarkers by ROC curve analysis.** The symbol \* in the Analyte/Indicator column indicates most robust biomarkers as defined by AUC  $\geq$  0.8, asymptotic  $p < 0.05$ , and AUC lower bound 95% CI  $\geq$  0.5.

| To Fig. 4A (CAP vs. Ctrl)  |                   |                   |                  |           |
|----------------------------|-------------------|-------------------|------------------|-----------|
| Rank                       | Analyte           | Mean AUC [95% CI] | Ratio of medians | p-value   |
| 1                          | Trp*              | 0.96 [0.81, 1.0]  | 0.64             | 2.68E-10  |
| 2                          | His*              | 0.94 [0.81, 1.0]  | 0.68             | 1.49E-09  |
| 3                          | Ala*              | 0.93 [0.77, 1.0]  | 0.6              | 3.78E-09  |
| 4                          | Cit*              | 0.90 [0.67, 1.0]  | 0.44             | 3.02E-08  |
| 5                          | Gln*              | 0.86 [0.64, 1.0]  | 0.71             | 7.51E-07  |
| 6                          | Thr*              | 0.83 [0.60, 1.0]  | 0.69             | 3.26E-06  |
| 7                          | t4OHPro*          | 0.82 [0.58, 1.0]  | 0.54             | 7.40E-06  |
| 8                          | Pro*              | 0.82 [0.62, 0.98] | 0.68             | 1.08E-05  |
| To Fig. 4B (COPD vs. Ctrl) |                   |                   |                  |           |
| Rank                       | Analyte           | Mean AUC [95% CI] | Ratio of medians | p-value   |
| 1                          | ADMA              | 0.81 [0.43, 1.0]  | 1.20             | 5.88E-04  |
| 2                          | Taurine           | 0.80 [0.33, 1.0]  | 0.76             | 1.24E-03  |
| To Fig. 4C (CAP vs. COPD)  |                   |                   |                  |           |
| Rank                       | Lipid             | Mean AUC [95% CI] | Ratio of medians | p-value   |
| 1                          | Asn*              | 0.92 [0.61, 1.0]  | 0.68             | 8.58E-06  |
| 2                          | Thr               | 0.92 [0.61, 1.0]  | 0.48             | 8.55E-06  |
| 3                          | Met               | 0.89 [0.58, 1.0]  | 0.68             | 3.98E-05  |
| 4                          | Gln*              | 0.88 [0.58, 1.0]  | 0.62             | 5.59E-05  |
| 5                          | Tyr               | 0.87 [0.56, 1.0]  | 0.63             | 1.33E-04  |
| 6                          | Cit*              | 0.86 [0.58, 1.0]  | 0.52             | 1.26E-04  |
| 7                          | Orn               | 0.85 [0.5, 1.0]   | 0.64             | 1.26E-04  |
| 8                          | Arg*              | 0.85 [0.5, 1.0]   | 0.58             | 1.56E-04  |
| 9                          | Pro               | 0.83 [0.5, 1.0]   | 0.67             | 2.36E-04  |
| 10                         | Lys               | 0.82 [0.42, 1.0]  | 0.66             | 4.73E-04  |
| 11                         | ADMA              | 0.82 [0.47, 1.0]  | 0.8              | 77.62E-04 |
| 12                         | Trp               | 0.81 [0.33, 1.0]  | 0.74             | 1.05E-03  |
| To Fig. 4D (CAP vs. Ctrl)  |                   |                   |                  |           |
| Rank                       | Indicator         | Mean AUC [95% CI] | Ratio of medians | p-value   |
| 1                          | Kyn / Trp*        | 0.94 [0.79, 1.0]  | 2.28             | 1.00E-09  |
| 2                          | Non essential AA* | 0.93 [0.74, 1.0]  | 0.71             | 4.30E-09  |
| 3                          | Tyr / Phe*        | 0.92 [0.73, 1.0]  | 0.63             | 7.35E-09  |



|                                   |                   |                          |                         |                |
|-----------------------------------|-------------------|--------------------------|-------------------------|----------------|
| 4                                 | Glucogenic AA*    | 0.92 [0.71, 1.0]         | 0.66                    | 8.68E-09       |
| 5                                 | Total AA*         | 0.91 [0.69, 1.0]         | 0.77                    | 1.11E-08       |
|                                   |                   |                          |                         |                |
| <b>To Fig. 4E (COPD vs. Ctrl)</b> |                   |                          |                         |                |
| <b>Rank</b>                       | <b>Indicator</b>  | <b>Mean AUC [95% CI]</b> | <b>Ratio of medians</b> | <b>p-value</b> |
| 1                                 | Thr / Ser         | 0.81 [0.48, 1.0]         | 1.36                    | 7.24E-04       |
|                                   |                   |                          |                         |                |
| <b>To Fig. 4F (CAP vs. COPD)</b>  |                   |                          |                         |                |
| <b>Rank</b>                       | <b>Indicator</b>  | <b>Mean AUC [95% CI]</b> | <b>Ratio of medians</b> | <b>p-value</b> |
| 1                                 | Total AA*         | 0.93 [0.67, 1.0]         | 0.74                    | 5.92E-06       |
| 2                                 | Non essential AA* | 0.91 [0.70, 1.0]         | 0.69                    | 1.16E-05       |
| 3                                 | Thr / Ser*        | 0.90 [0.56, 1.0]         | 0.68                    | 3.35E-05       |
| 4                                 | Glucogenic AA*    | 0.86 [0.56, 1.0]         | 0.70                    | 1.33E-04       |
| 5                                 | Tyr / Phe*        | 0.85 [0.50, 1.0]         | 0.71                    | 1.56E-04       |

**Table S4.** Results of oversampling procedure, modeling the effect of increasing sample size of COPD to sample size of CAP ( $n = 29$ ).

| Biomarkers for CAP vs. COPD (ROC analysis) |         |                      |                  |          |
|--------------------------------------------|---------|----------------------|------------------|----------|
| Rank                                       | Analyte | Mean AUC<br>[95% CI] | Ratio of medians | p-value  |
| 1                                          | Thr     | 0.94 [0.8, 1.0]      | 0.47             | 1.13E-08 |
| 2                                          | Asn     | 0.94 [0.8, 1.0]      | 0.65             | 1.51E-08 |
| 3                                          | Tyr     | 0.89 [0.67, 1.0]     | 0.62             | 2.62E-07 |
| 4                                          | Met     | 0.89 [0.63, 1.0]     | 0.67             | 4.41E-07 |
| 5                                          | Arg     | 0.88 [0.67, 1.0]     | 0.57             | 7.66E-07 |
| 6                                          | Gln     | 0.87 [0.64, 1.0]     | 0.62             | 9.46E-07 |
| 7                                          | Cit     | 0.86 [0.63, 1.0]     | 0.51             | 2.15E-06 |
| 8                                          | Trp     | 0.84 [0.5, 1.0]      | 0.77             | 9.53E-06 |
| 9                                          | Pro     | 0.84 [0.6, 1.0]      | 0.67             | 9.18E-06 |
| 10                                         | Lys     | 0.83 [0.6, 1.0]      | 0.61             | 1.73E-05 |
| 11                                         | Ala     | 0.83 [0.57, 1.0]     | 0.63             | 1.19E-05 |
| 12                                         | ADMA    | 0.82 [0.57, 1.0]     | 0.8              | 2.30E-05 |

## Reference

1. Biocrates\_Life\_Sciences. Factsheet Met/DQ<sup>TM</sup> RatioExplorer 2019. Available from: [http://www.biocrates.com/images/FS\\_RatioExplorer%203.pdf](http://www.biocrates.com/images/FS_RatioExplorer%203.pdf).
